# Supplementary material
Source: MDPI journal article supplement (https://www.mdpi.com/2227-9040/10/12/500)
Supplement: s1 [file s1 › chemosensors-2031565-supplementary.pdf]

Supplementary Materials

# **A Dual Fluorometric and Colorimetric Sulfide Sensor Based on Coordinating Self-Assembled Nanorods: Applicable for Monitoring Meat Spoilage**

**Rana Dalapati, Matthew Hunter and Ling Zang \***

Department of Materials Science and Engineering, Nano Institute of Utah, University of Utah,  
Salt Lake City, UT 84112, USA

\*Correspondence: [lzang@eng.utah.edu](mailto:lzang@eng.utah.edu)

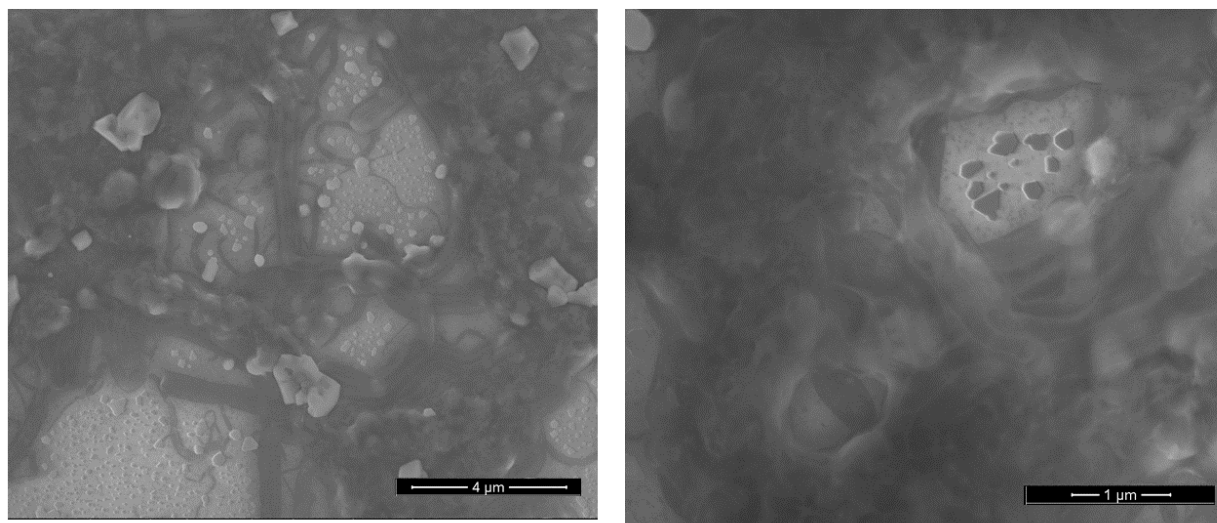

**Figure S1.** SEM image of the APBI-K.

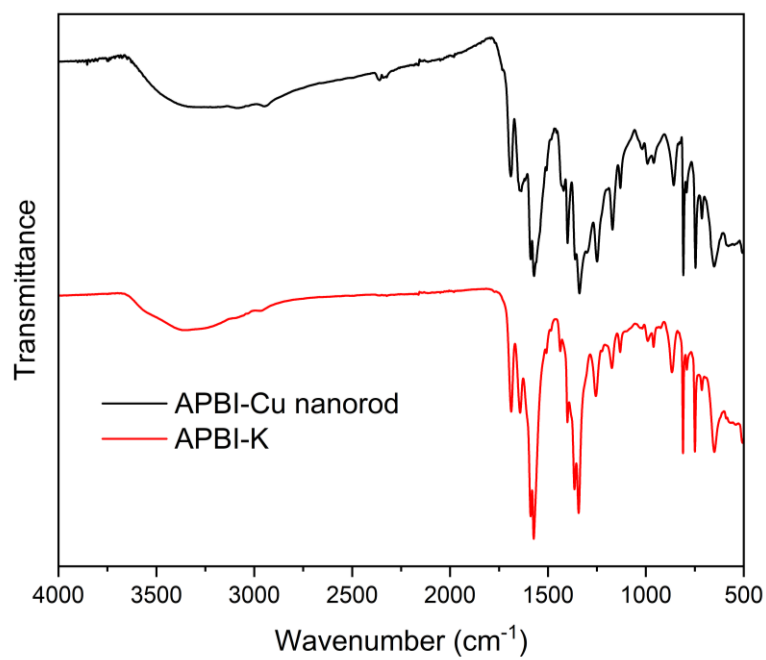

**Figure S2.** ATR-IR spectra of **APBI-K** and **APBI-Cu** nanorods.

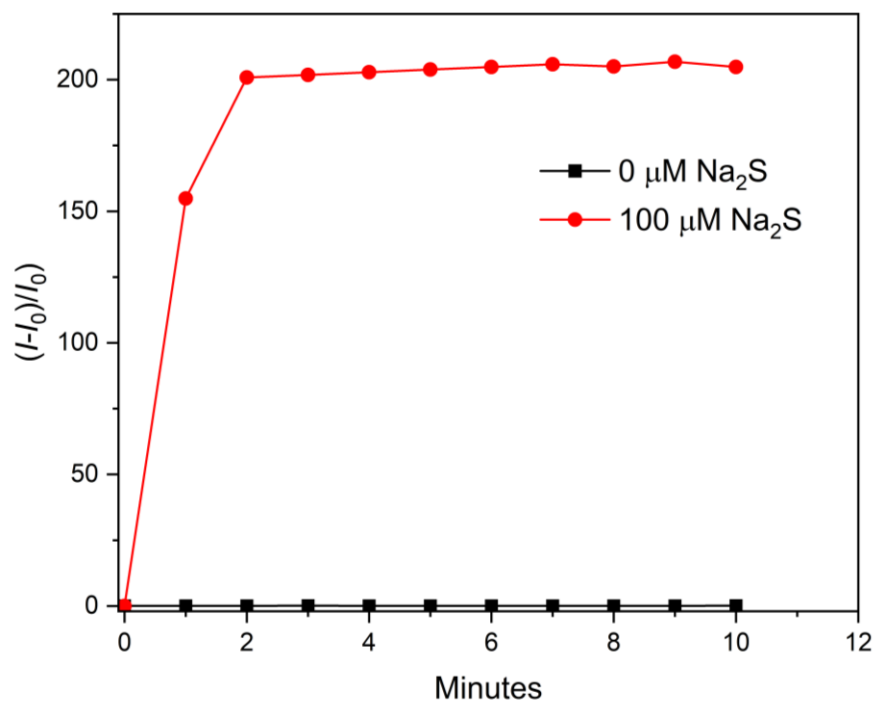

**Figure S3.** Time dependent relative changes of emission intensity of **APBI-Cu** nanorods with  $\text{Na}_2\text{S}$ .

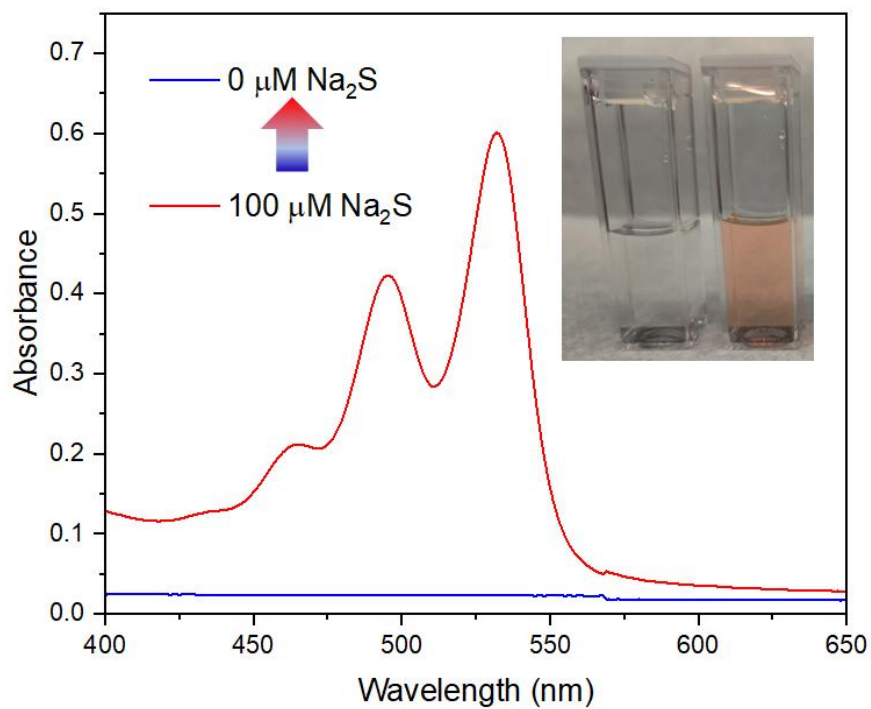

**Figure S4.** Change in absorption spectra of **APBI-Cu** nanorods in presence of  $\text{Na}_2\text{S}$ . Inset showing corresponding change in color of the solution.

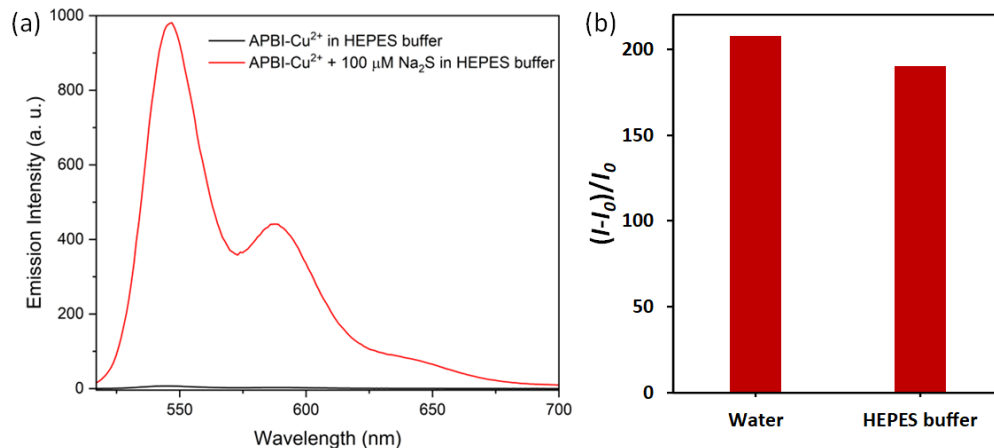

**Figure S5.** (a) Change in emission spectra of **APBI-Cu** nanorods in presence of Na<sub>2</sub>S in HEPES buffer medium at pH 7.4. and other competitive molecules and anions. (b) The bar plot showing the relative change in emission spectra of **APBI-Cu** nanorods in presence of Na<sub>2</sub>S in pure water and HEPES buffer medium.

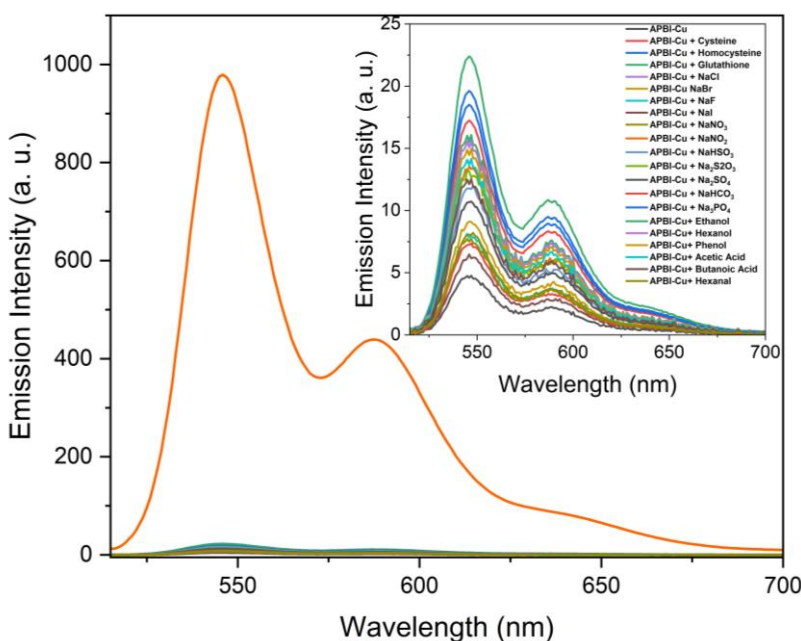

**Figure S6.** Change in emission spectra of **APBI-Cu** nanorods in presence of Na<sub>2</sub>S and other competitive molecules and anions. Inset showing the enlarged view of the spectral change for other analytes.

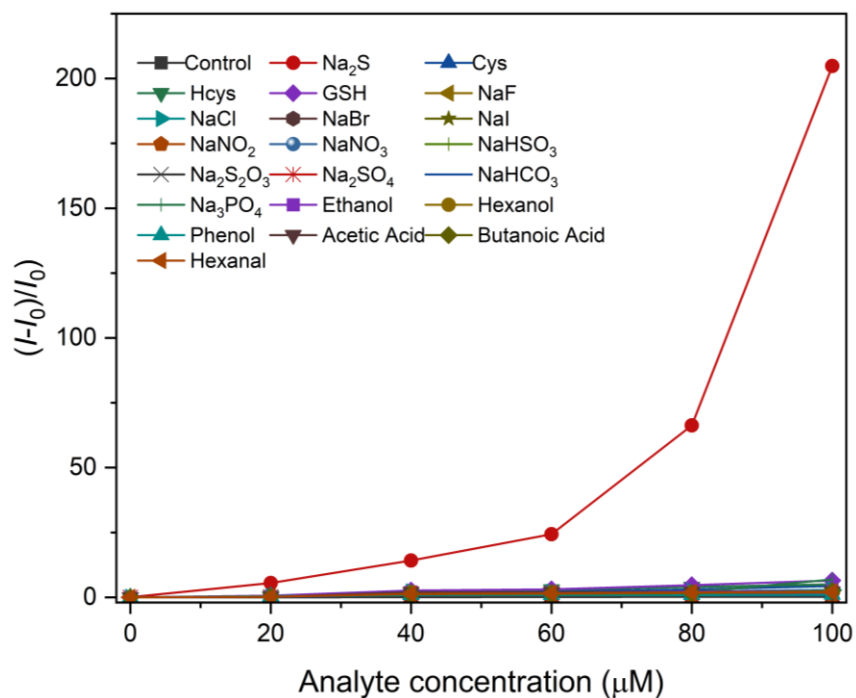

**Figure S7:** Concentration dependent change in emission spectra of **APBI-Cu** nanorods in presence of  $\text{Na}_2\text{S}$  and other competitive analytes (final concentration: 100  $\mu\text{M}$ ).

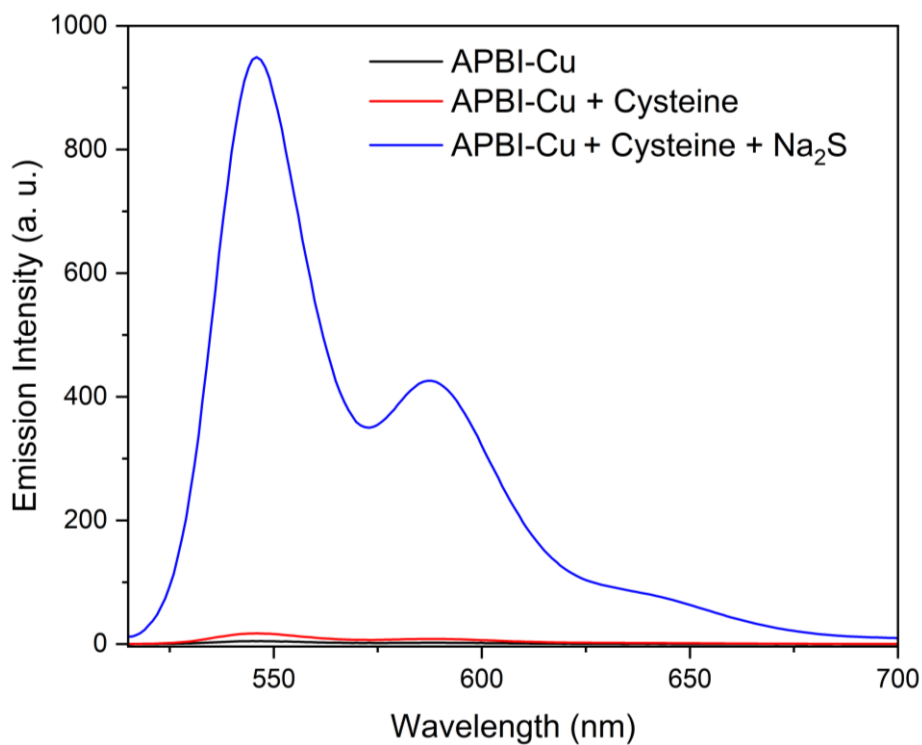

**Figure S8:** Competitive detection of  $\text{Na}_2\text{S}$  by **APBI-Cu** nanorods in presence of Cysteine.

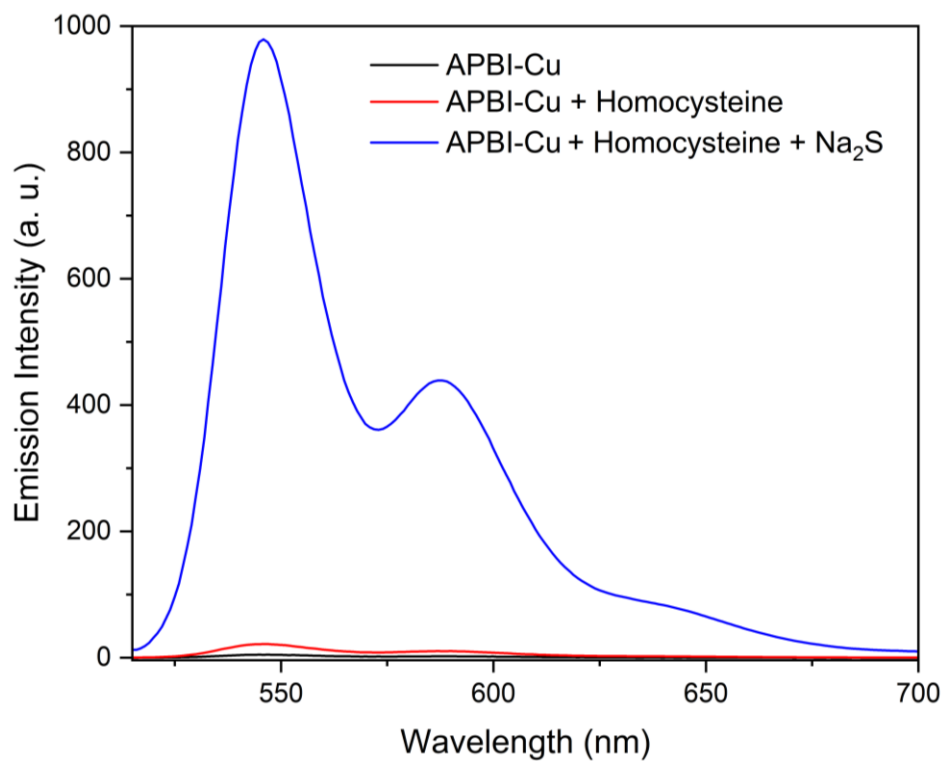

**Figure S9:** Competitive detection of Na<sub>2</sub>S by **APBI-Cu** nanorods in presence of Homocysteine.

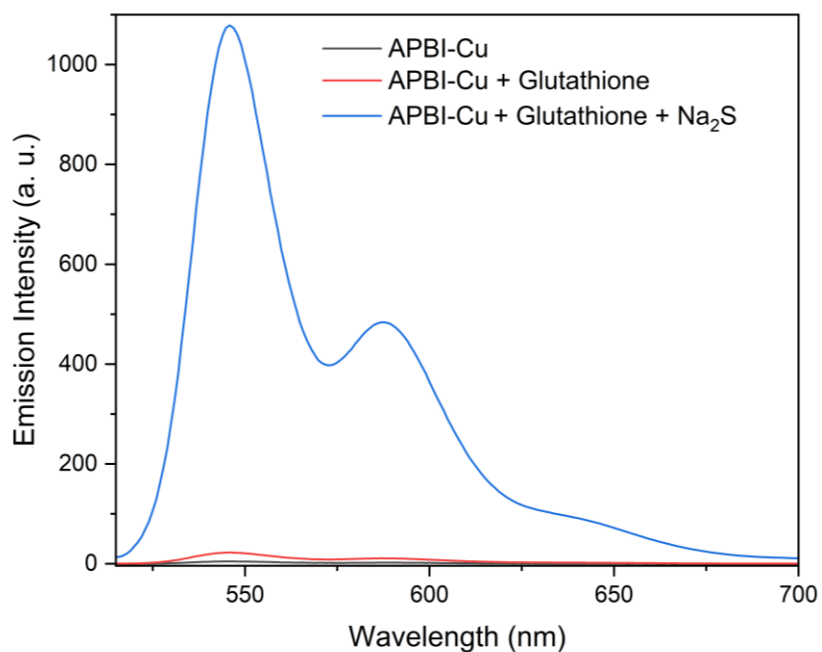

**Figure S10:** Competitive detection of Na<sub>2</sub>S by **APBI-Cu** nanorods in presence of Glutathione.

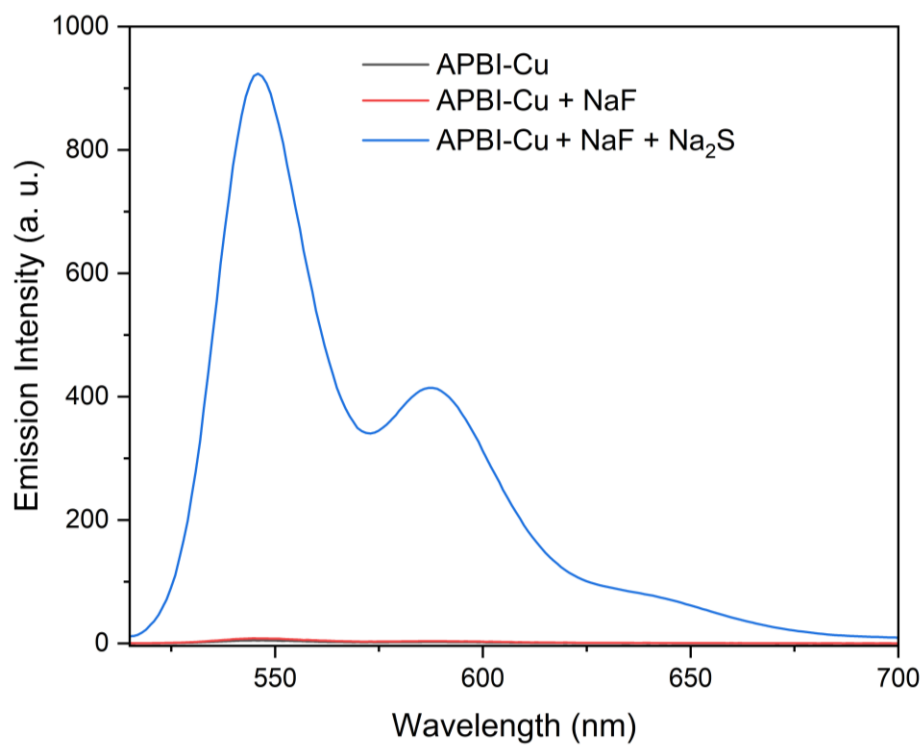

**Figure S11:** Competitive detection of Na<sub>2</sub>S by **APBI-Cu** nanorods in presence of NaF.

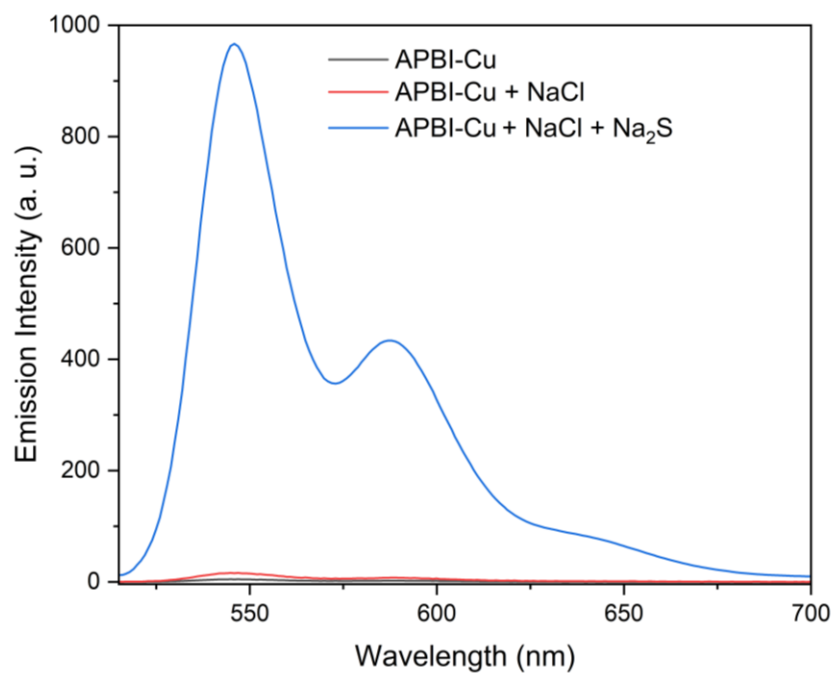

**Figure S12:** Competitive detection of Na<sub>2</sub>S by **APBI-Cu** nanorods in presence of NaCl.

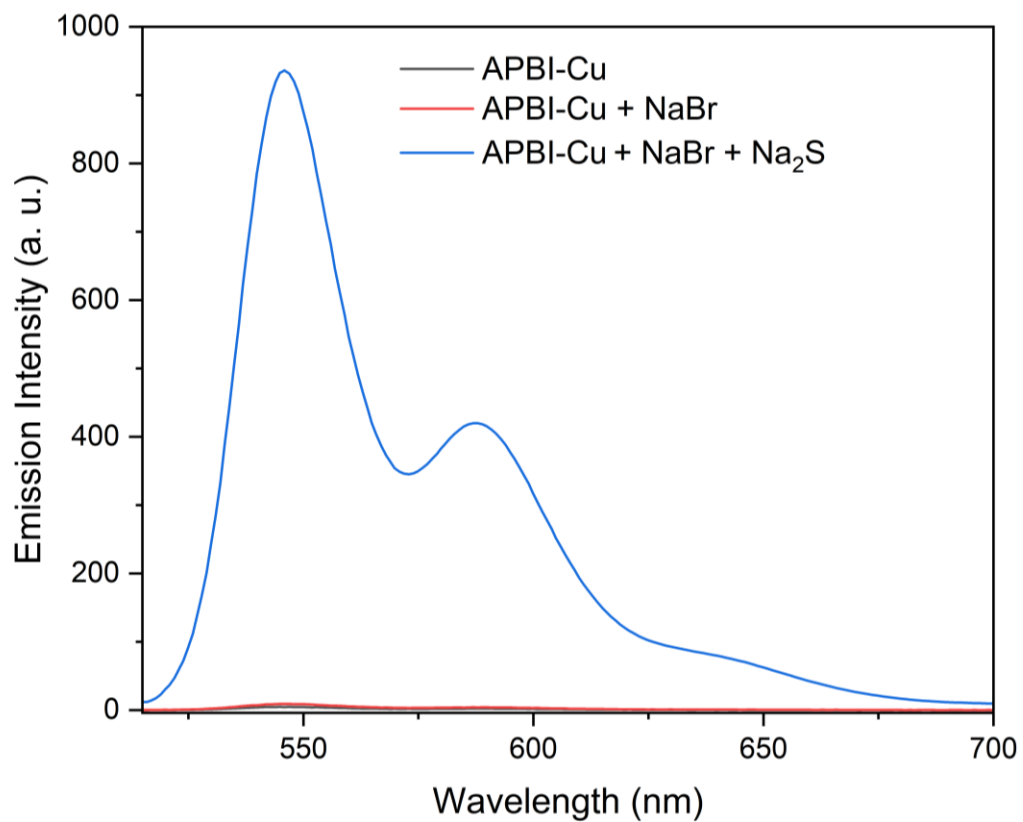

**Figure S13:** Competitive detection of  $\text{Na}_2\text{S}$  by **APBI-Cu** nanorods in presence of NaBr.

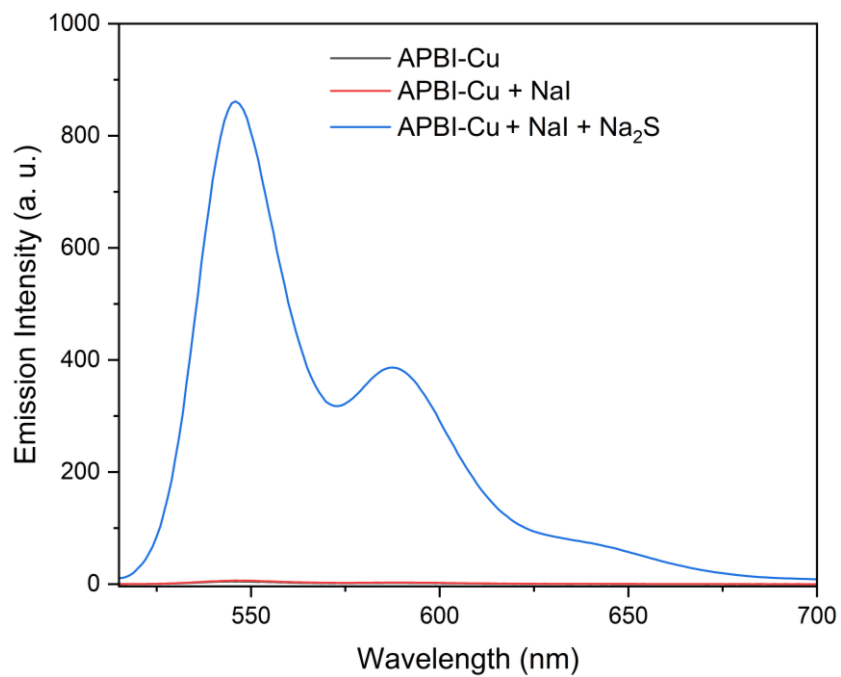

**Figure S14:** Competitive detection of  $\text{Na}_2\text{S}$  by **APBI-Cu** nanorods in presence of NaI.

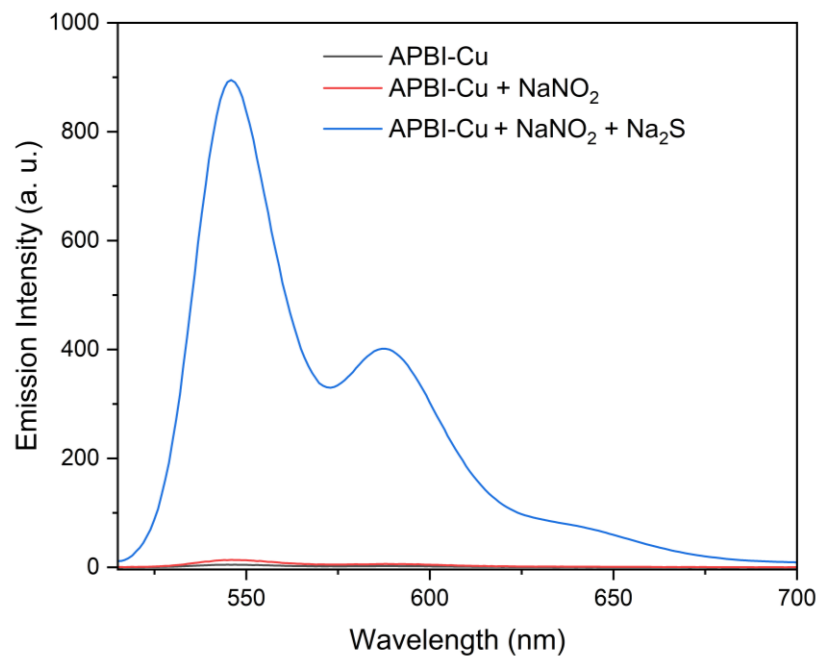

**Figure S15:** Competitive detection of  $\text{Na}_2\text{S}$  by **APBI-Cu** nanorods in presence of  $\text{NaNO}_2$ .

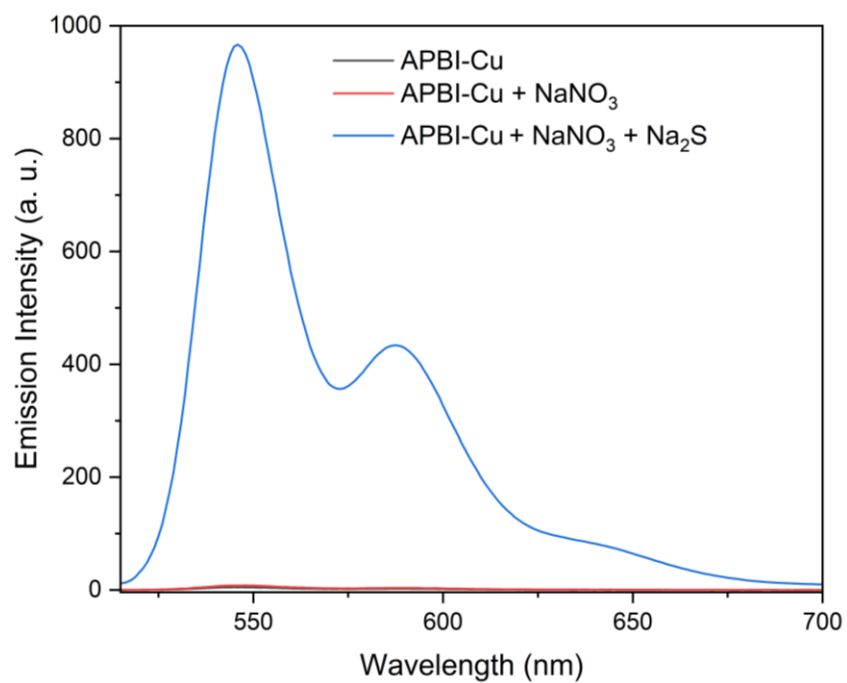

**Figure S16:** Competitive detection of  $\text{Na}_2\text{S}$  by **APBI-Cu** nanorods in presence of  $\text{NaNO}_3$ .

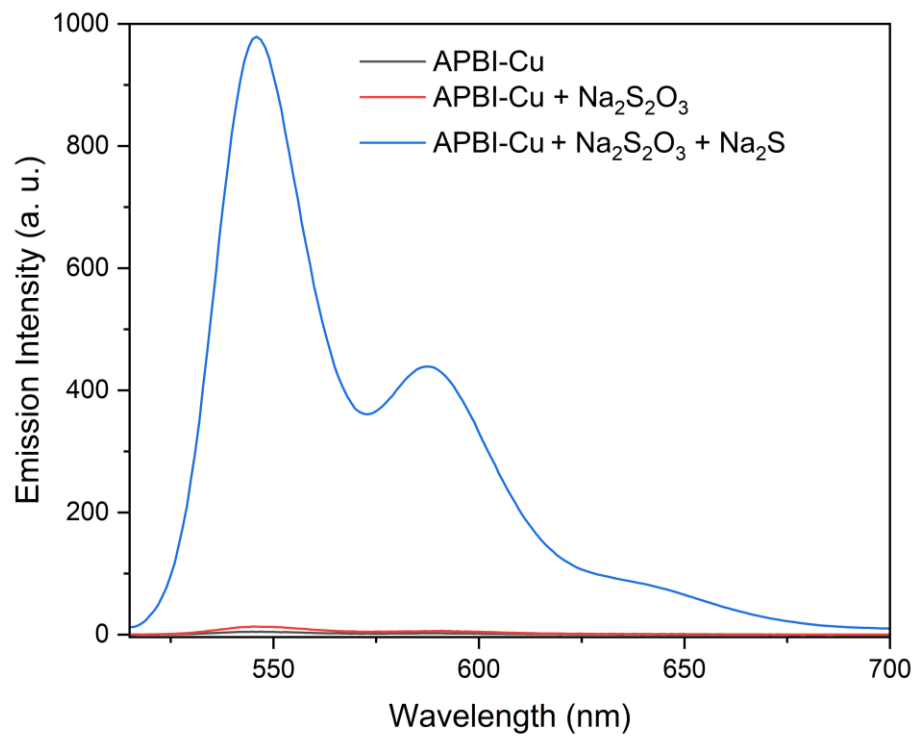

**Figure S17:** Competitive detection of  $\text{Na}_2\text{S}$  by **APBI-Cu** nanorods in presence of  $\text{Na}_2\text{S}_2\text{O}_3$ .

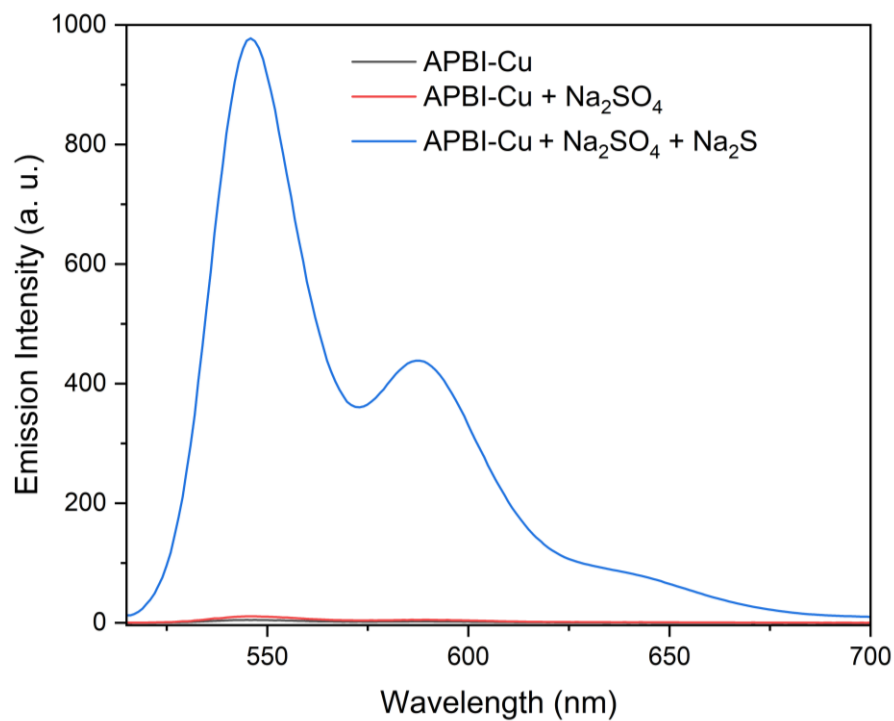

**Figure S18:** Competitive detection of  $\text{Na}_2\text{S}$  by **APBI-Cu** nanorods in presence of  $\text{Na}_2\text{SO}_4$ .

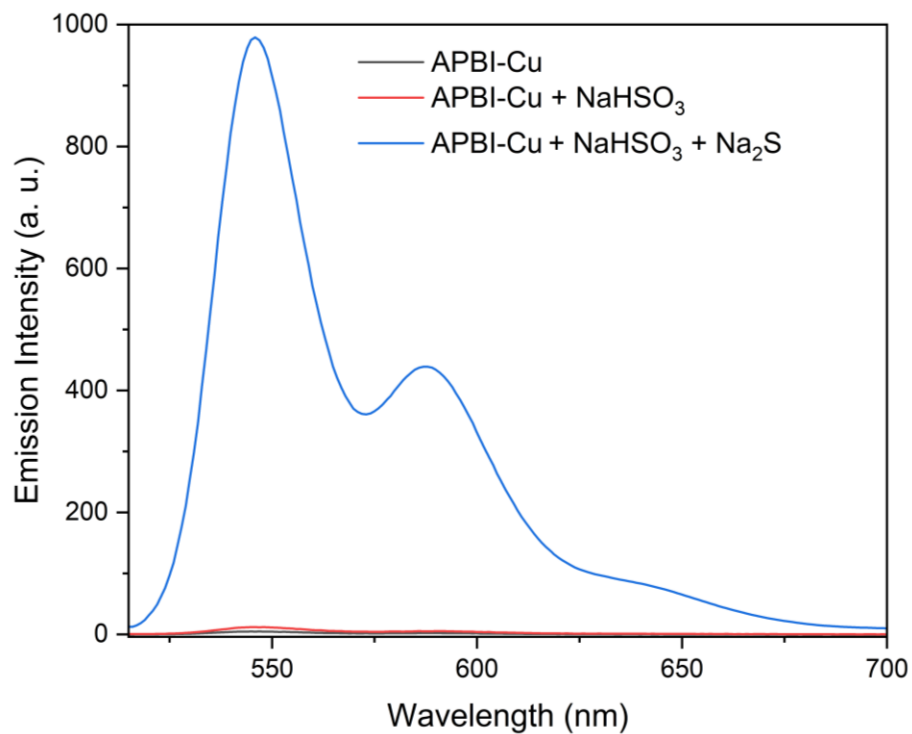

**Figure S19:** Competitive detection of Na<sub>2</sub>S by **APBI-Cu** nanorods in presence of NaHSO<sub>3</sub>.

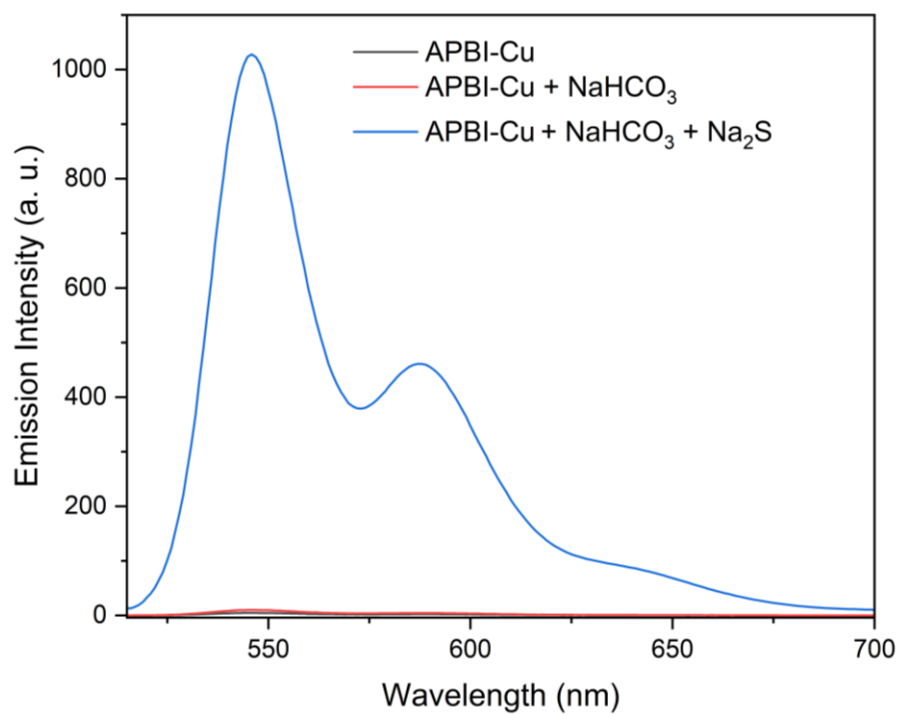

**Figure S20:** Competitive detection of Na<sub>2</sub>S by **APBI-Cu** nanorods in presence of NaHCO<sub>3</sub>.

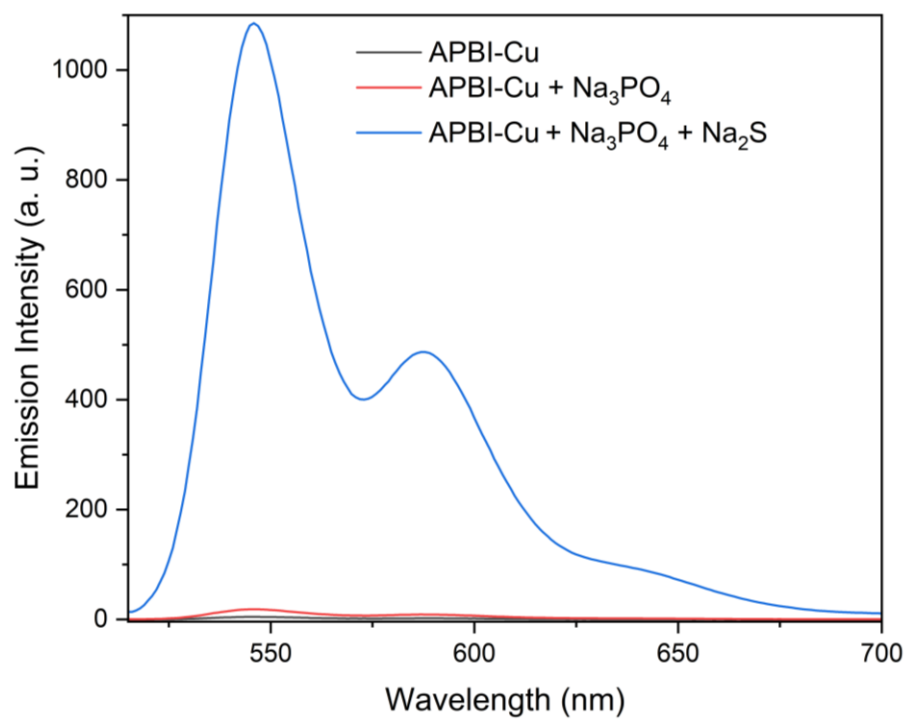

**Figure S21:** Competitive detection of Na<sub>2</sub>S by **APBI-Cu** nanorods in presence of Na<sub>3</sub>PO<sub>4</sub>.

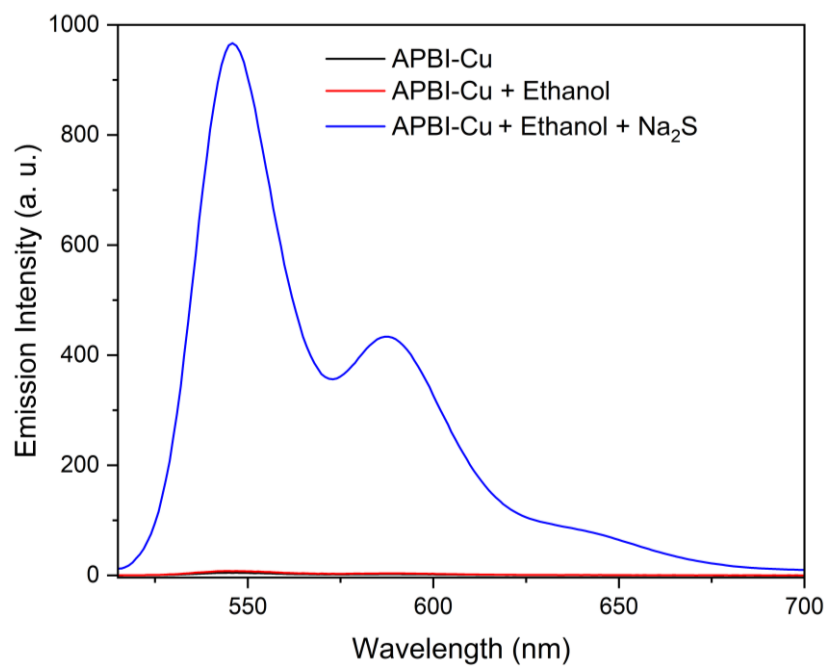

**Figure S22:** Competitive detection of Na<sub>2</sub>S by **APBI-Cu** nanorods in presence of Ethanol.

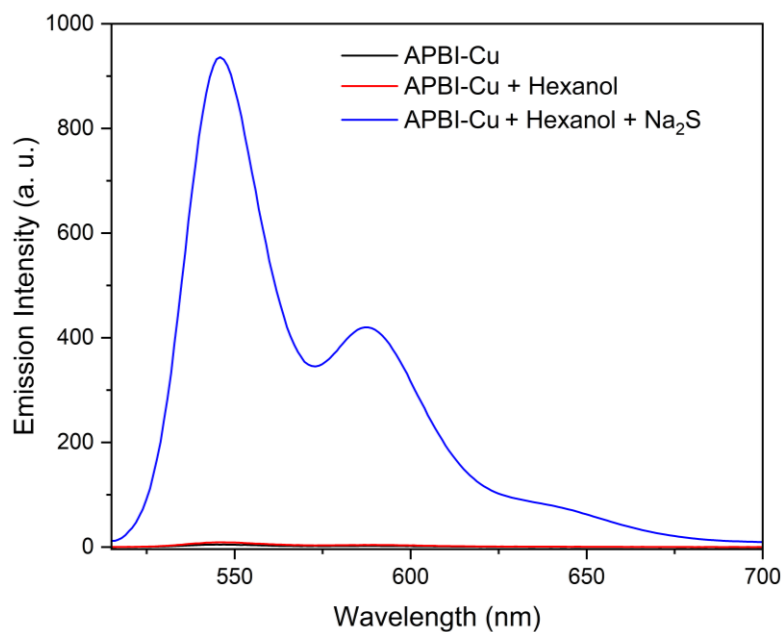

**Figure S23:** Competitive detection of  $\text{Na}_2\text{S}$  by **APBI-Cu** nanorods in presence of Hexanol.

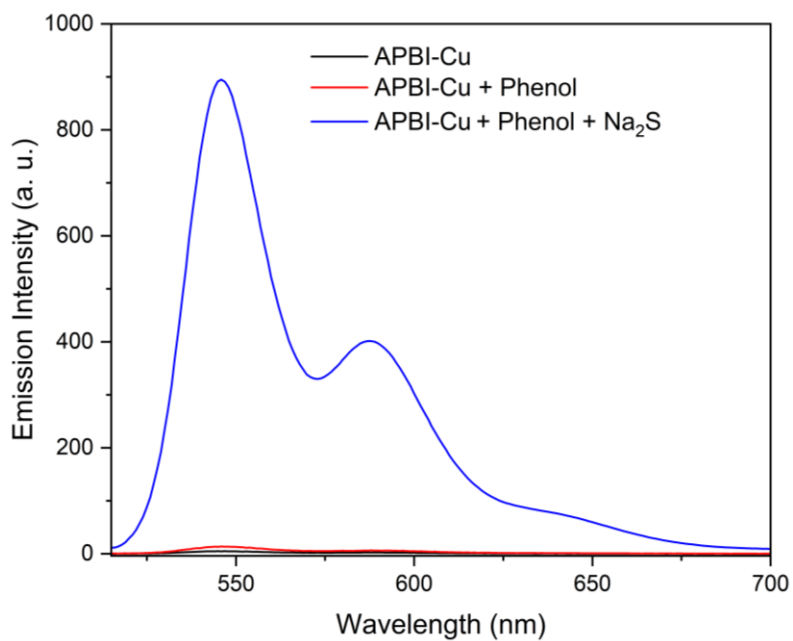

**Figure S24:** Competitive detection of  $\text{Na}_2\text{S}$  by **APBI-Cu** nanorods in presence of Phenol.

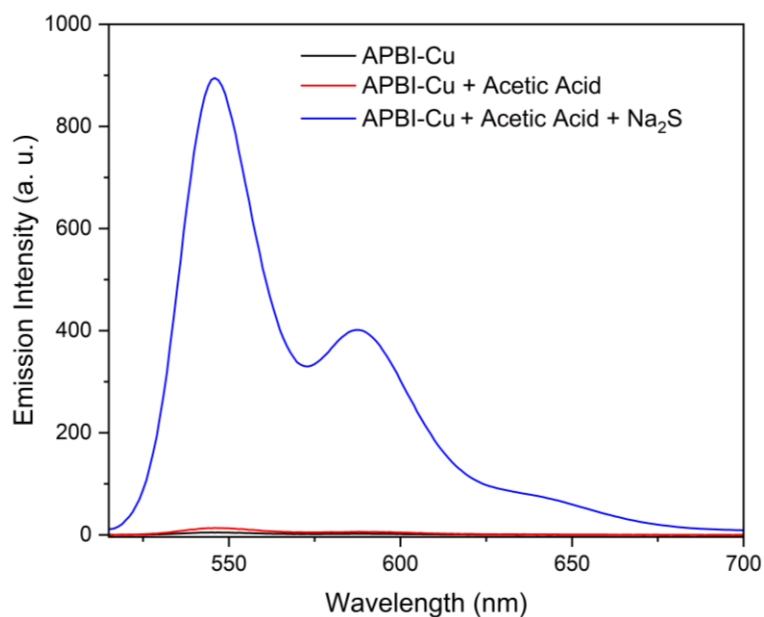

**Figure S25:** Competitive detection of  $\text{Na}_2\text{S}$  by APBI-Cu nanorods in presence of Acetic Acid.

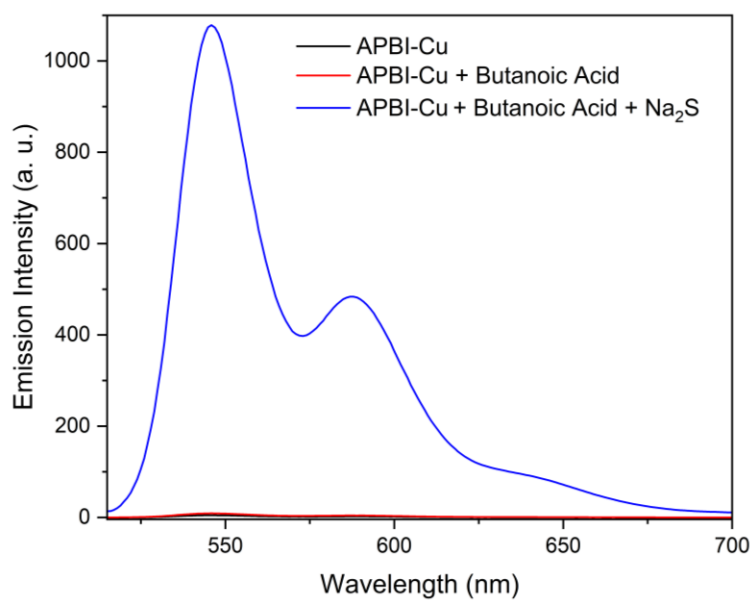

**Figure S26:** Competitive detection of  $\text{Na}_2\text{S}$  by APBI-Cu nanorods in presence of Butanoic Acid.

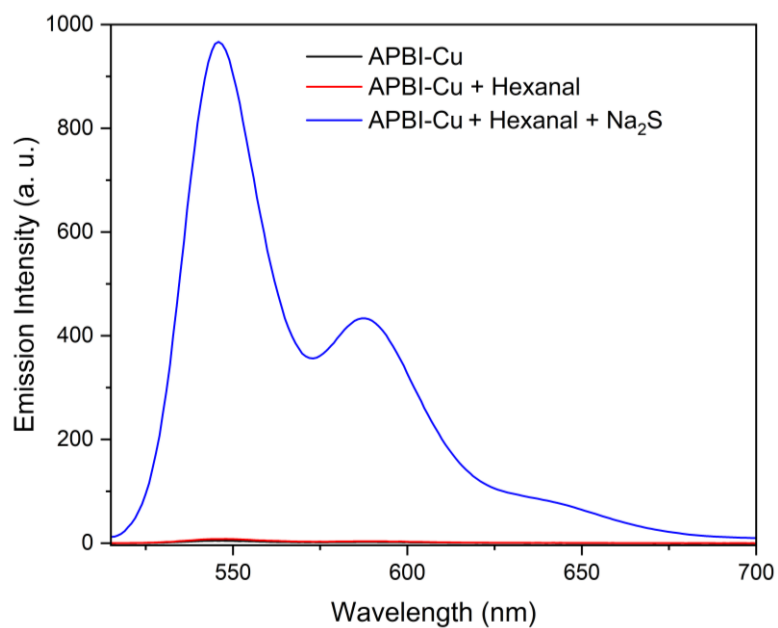

**Figure S27:** Competitive detection of Na<sub>2</sub>S by **APBI-Cu** nanorods in presence of Hexanal.

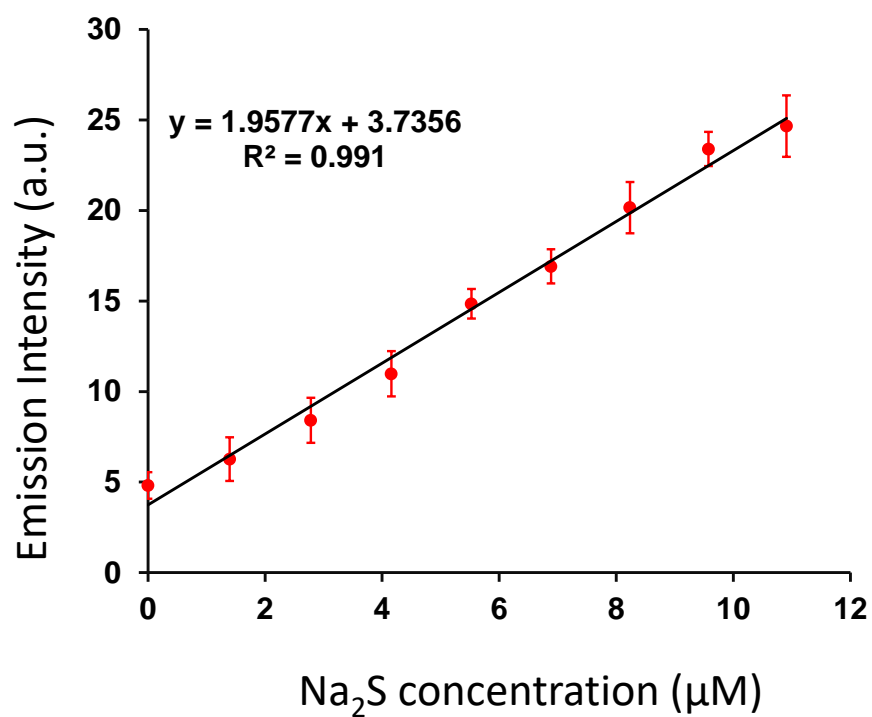

**Figure S28:** Liner turn-on response of **APBI-Cu** nanorods in presence of Na<sub>2</sub>S.

**Table S1:** List of few recently reported sulfide sensor material works with similar metal ion displacement mechanism.

| Sensor material                                          | Sensing medium                                     | Both Fluorometric and colorimetric | Involvement of organic solvent | Detection limit     | Reference |
|----------------------------------------------------------|----------------------------------------------------|------------------------------------|--------------------------------|---------------------|-----------|
| Lipid bilayer vesicle embedded copper complex (Ves-1.Cu) | Phosphate buffer,                                  | Yes                                | NO                             | 4.06 $\mu\text{M}$  | [1]       |
| Azine based fluorescein indicator                        | HEPES- $\text{CH}_3\text{CN}$                      | NO                                 | Yes                            | 1.7 $\mu\text{M}$   | [2]       |
| Macrocyclic ring with naphthalimide moiety               | $\text{H}_2\text{O}$ - $\text{CH}_3\text{OH}$      | Yes                                | Yes                            | 0.7 $\mu\text{M}$   | [3]       |
| Cyanine NIR dye                                          | aqueous solution with 1% DMSO                      | Yes                                | Yes                            | 1.186 $\mu\text{M}$ | [4]       |
| Histidine-modified perylene diimide fluorescent probe    | HEPES buffer                                       | No                                 | NO                             | 0.41 $\mu\text{M}$  | [5]       |
| [Cu(MaT-cyclen) $_2$ ]                                   | water                                              | NO                                 | NO                             | 0.205 $\mu\text{M}$ | [6]       |
| Zinc based Schiff base complex                           | $\text{CH}_3\text{CH}_2\text{OH}$ -Tris-HCl buffer | NO                                 | Yes                            | $10^{-6}$ M         | [7]       |
| Coumarin-based fluorescent probe                         | HEPES buffer solution with 0.5% DMSO               | NO                                 | Yes                            | 88.5 nM             | [8]       |
| BODIPY-based fluorescent probe                           | HEPES buffer with 5% $\text{CH}_3\text{CN}$        | NO                                 | Yes                            | 5.5 $\mu\text{M}$ . | [9]       |
| Eu $^{3+}$ /Cu $^{2+}$ @Znpda MOF                        | HEPES buffer                                       | NO                                 | NO                             | 1.45 $\mu\text{M}$  | [10]      |
| Eu(III)-Cu(II) Heterometallic-Organic Framework          | HEPES buffer                                       | NO                                 | NO                             | 0.130 $\mu\text{M}$ | [11]      |

|                                                          |                                    |            |           |                                       |                  |
|----------------------------------------------------------|------------------------------------|------------|-----------|---------------------------------------|------------------|
| Diaminomaleonitrile (DAMN)-based salen-type zinc complex | DMSO                               | Yes        | Yes       | 10 $\mu\text{M}$                      | [12]             |
| lanthanide coordination polymer (AMP/Tb/Ag CP)           | HEPES buffer                       | NO         | NO        | 0.3 $\mu\text{M}$                     | [13]             |
| Cyclam-functionalized CD/Cu <sup>2+</sup>                | HEPES buffer                       | NO         | NO        | 0.13 $\mu\text{M}$                    | [14]             |
| Calix[4]arene benzothiazole/Cu <sup>2+</sup>             | phosphate buffer                   | NO         | NO        | 1.54 $\mu\text{M}$                    | [15]             |
| carbon dots/Hg <sup>2+</sup>                             | HEPES buffer                       | NO         | NO        | 0.32 $\mu\text{M}$                    | [16]             |
| L-Cu <sup>2+</sup> complex                               | HEPES buffer with 3% DMSO          | NO         | Yes       | 0.85 $\mu\text{M}$                    | [17]             |
| Zinc Complex                                             | CH <sub>3</sub> CN–Tris-HCl buffer | NO         | Yes       | 1.2 $\mu\text{M}$                     | [18]             |
| Fluorescent probe (D-CN)                                 | PBS buffer with 30% DMF            | NO         | Yes       | 30 $\mu\text{M}$ .                    | [19]             |
| <b>APBI-Cu nanorods</b>                                  | pure Water and HEPES buffer        | <b>YES</b> | <b>NO</b> | <b>0.181 <math>\mu\text{M}</math></b> | <b>This Work</b> |

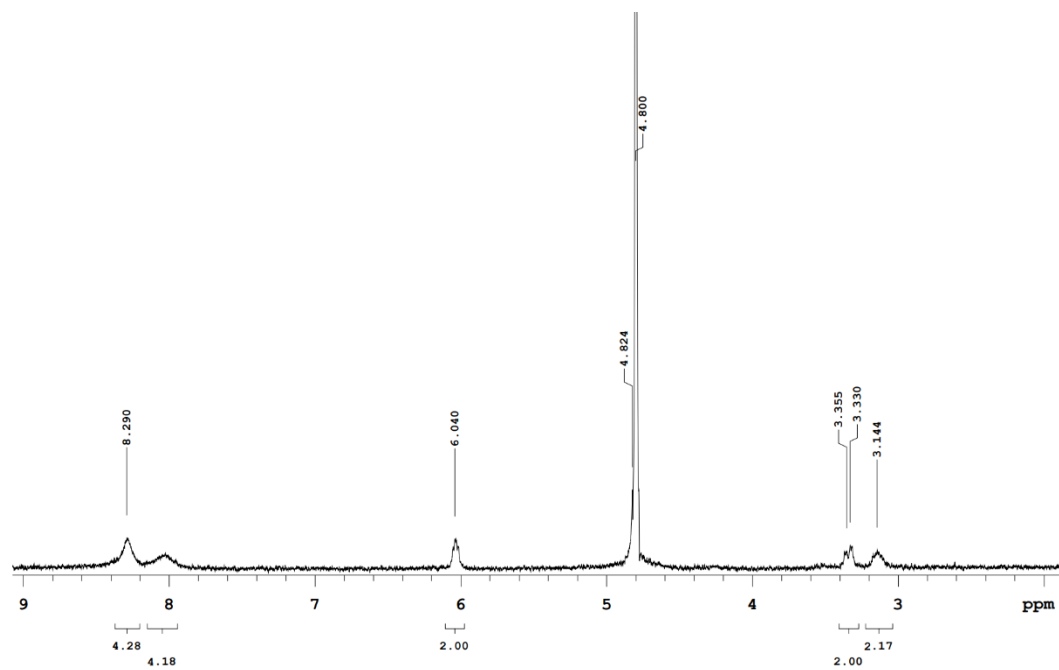

**Figure S29:** <sup>1</sup>H NMR spectra of APBI-K in D<sub>2</sub>O.

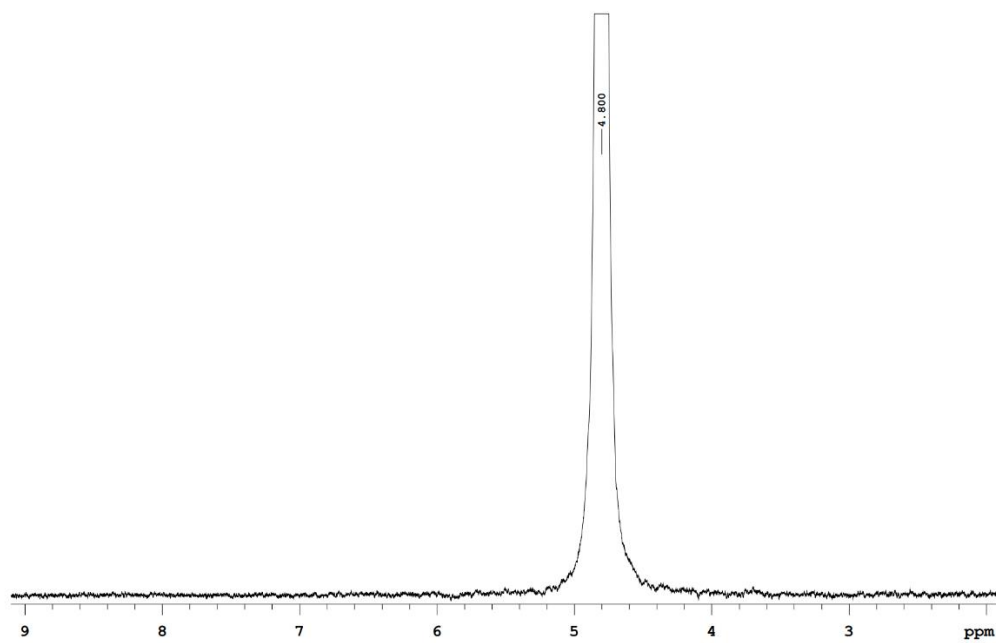

**Figure S30:** <sup>1</sup>H NMR spectra of APBI-K after complexation with Cu<sup>2+</sup> ion in D<sub>2</sub>O.

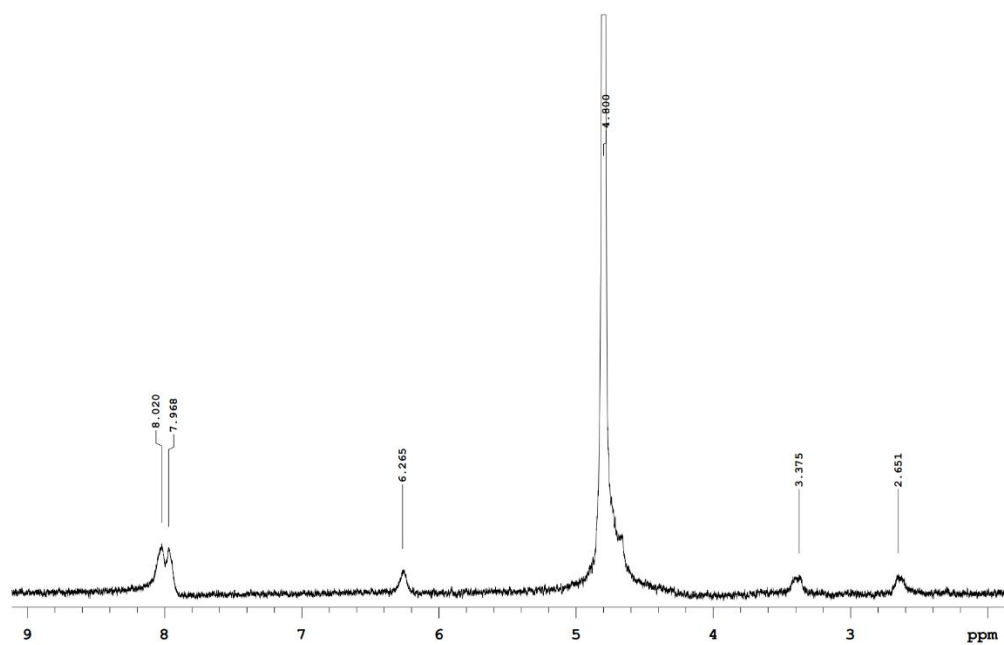

**Figure S31:**  $^1\text{H}$  NMR spectra of **APBI-Cu** nanorods after treatment of  $\text{Na}_2\text{S}$  in  $\text{D}_2\text{O}$ .

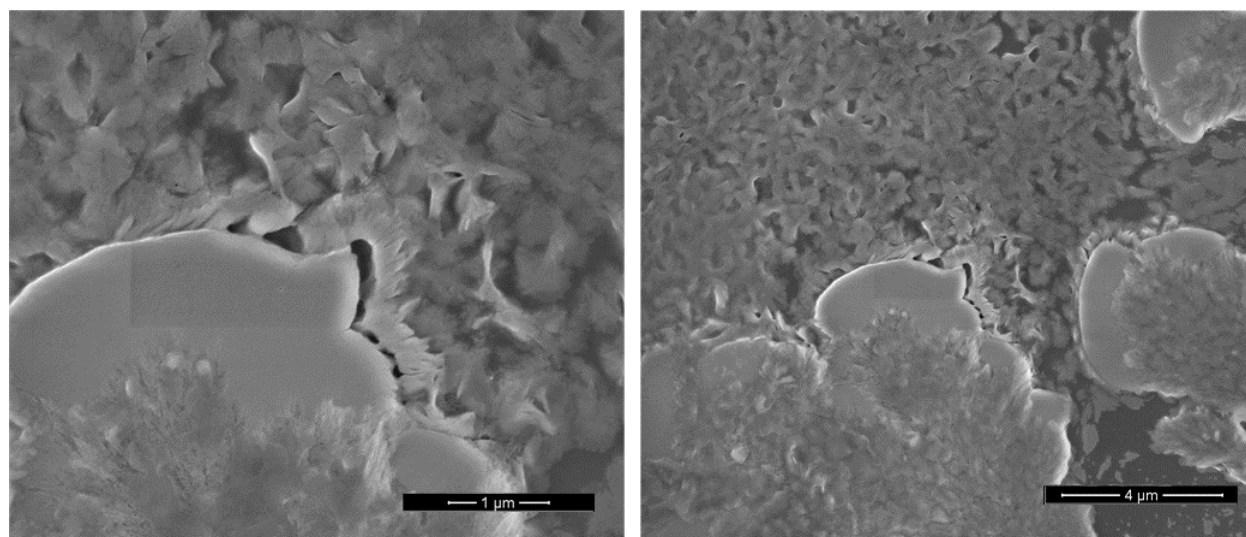

**Figure S32:** SEM images of **APBI-Cu** nanorods after the treatment of  $\text{Na}_2\text{S}$ .

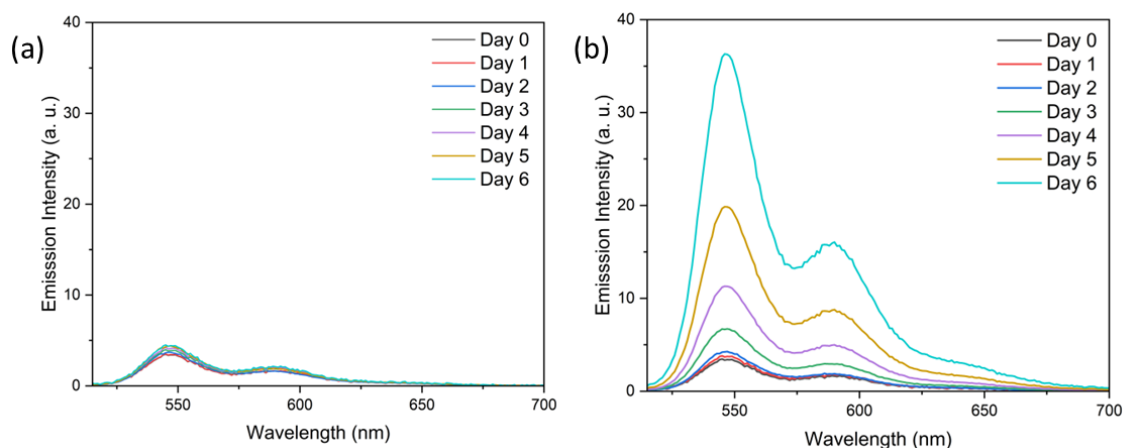

**Figure S33:** Change in emission spectra of **APBI-Cu** nanorods after bubbling the gas collected from meat sample stored at (a)  $-4\text{ }^{\circ}\text{C}$  and (b) room temperature.

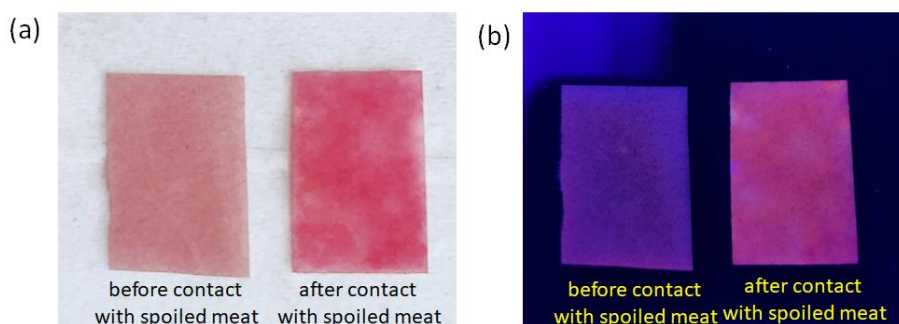

**Figure S34.** Digital images of paper strips coated with **APBI-Cu** under (a) daylight and (b) UV-lamp before and after the contact with spoiled meat.

## References:

1. Kaushik, R.; Sakla, R.; Ghosh, A.; Selvan, G.T.; Selvakumar, P.M.; Jose, D.A. Selective detection of  $\text{H}_2\text{S}$  by copper complex embedded in vesicles through metal indicator displacement approach. *ACS Sens.* **2018**, *3*, 1142-1148, doi:<https://doi.org/10.1021/acssensors.8b00174>.
2. Hou, F.; Cheng, J.; Xi, P.; Chen, F.; Huang, L.; Xie, G.; Shi, Y.; Liu, H.; Bai, D.; Zeng, Z. Recognition of copper and hydrogen sulfide in vitro using a fluorescein derivative indicator. *Dalton Trans.* **2012**, *41*, 5799-5804, doi:<https://doi.org/10.1039/C2DT12462A>.
3. Lou, X.; Mu, H.; Gong, R.; Fu, E.; Qin, J.; Li, Z. Displacement method to develop highly sensitive and selective dual chemosensor towards sulfide anion. *Analyst* **2011**, *136*, 684-687, doi:<https://doi.org/10.1039/C0AN00742K>.

4. Hu, Y.; Yin, J.; Yoon, J. A multi-responsive cyanine-based colorimetric chemosensor containing dipicolylamine moieties for the detection of Zn (II) and Cu (II) ions. *Sens. Actuators, B* **2016**, 230, 40-45, doi:<https://doi.org/10.1016/j.snb.2016.02.040>.
5. Gao, X.; Li, Y.; Zhang, J.; Cheng, N.; Zhang, L.; Zhang, Z.; Yao, Z. Rapid detection of hydrogen sulfide in vegetables and monosodium glutamate based on perylene supramolecular aggregates using an indicator displacement assays strategy. *Spectrochim. Acta, Part A* **2022**, 276, 121223, doi:<https://doi.org/10.1016/j.saa.2022.121223>.
6. Palanisamy, S.; Lee, L.-Y.; Wang, Y.-L.; Chen, Y.-J.; Chen, C.-Y.; Wang, Y.-M. A water soluble and fast response fluorescent turn-on copper complex probe for H<sub>2</sub>S detection in zebra fish. *Talanta* **2016**, 147, 445-452, doi:<https://doi.org/10.1016/j.talanta.2015.10.019>.
7. Dong, Z.; Le, X.; Zhou, P.; Dong, C.; Ma, J. Sequential recognition of zinc ion and hydrogen sulfide by a new quinoline derivative with logic gate behavior. *RSC Adv.* **2014**, 4, 18270-18277, doi:<https://doi.org/10.1039/C3RA47755J>.
8. Gao, L.-L.; Wang, B.-B.; Chen, X.; Wang, Y.; Wu, W.-N.; Zhao, X.-L.; Yan, L.-L.; Fan, Y.-C.; Xu, Z.-H. Hydrazone derivative bearing coumarin for the relay detection of Cu<sup>2+</sup> and H<sub>2</sub>S in an almost neat aqueous solution and bioimaging in lysosomes. *Spectrochim. Acta, Part A* **2021**, 255, 119693, doi:<https://doi.org/10.1016/j.saa.2021.119693>.
9. Wu, S.; Ma, X.; Wang, Y.; Zhou, J.; Li, X.; Wang, X. A novel fluorescent BODIPY-based probe for detection of Cu<sup>2+</sup> and H<sub>2</sub>S based on displacement approach. *Spectrochim. Acta, Part A* **2021**, 249, 119330, doi:<https://doi.org/10.1016/j.saa.2020.119330>.
10. Han, X.; Gu, C.; Ding, Y.; Yu, J.; Li, K.; Zhao, D.; Chen, B. Stable Eu<sup>3+</sup>/Cu<sup>2+</sup>-functionalized supramolecular Zinc (II) complexes as fluorescent probes for turn-on and ratiometric detection of hydrogen sulfide. *ACS Appl. Mater. Interfaces* **2021**, 13, 20371-20379, doi:<https://doi.org/10.1021/acsami.1c04013>.
11. Zheng, X.; Fan, R.; Song, Y.; Xing, K.; Wang, P.; Yang, Y. Dual-Emitting Eu (III)-Cu (II) heterometallic-organic framework: simultaneous, selective, and sensitive detection of hydrogen sulfide and ascorbic acid in a wide range. *ACS Appl. Mater. Interfaces* **2018**, 10, 32698-32706, doi:<https://doi.org/10.1021/acsami.8b11367>.
12. Strianese, M.; Guarnieri, D.; Lamberti, M.; Landi, A.; Peluso, A.; Pellecchia, C. Fluorescent salen-type Zn (II) complexes as probes for detecting hydrogen sulfide and its anion: Bioimaging applications. *Inorg. Chem.* **2020**, 59, 15977-15986, doi:<https://doi.org/10.1021/acs.inorgchem.0c02499>.
13. Liu, B.; Chen, Y. Responsive lanthanide coordination polymer for hydrogen sulfide. *Anal. Chem.* **2013**, 85, 11020-11025, doi:<https://doi.org/10.1021/ac402651y>.
14. Chen, J.; Li, Y.; Lv, K.; Zhong, W.; Wang, H.; Wu, Z.; Yi, P.; Jiang, J. Cyclam-functionalized carbon dots sensor for sensitive and selective detection of copper (II) ion and sulfide anion in aqueous media and its imaging in live cells. *Sens. Actuators, B* **2016**, 224, 298-306, doi:<https://doi.org/10.1016/j.snb.2015.10.046>.
15. Wang, Z.-X.; Zheng, C.-L.; Ding, S.-N. Label-free detection of sulfide ions based on fluorescence quenching of unmodified core-shell Au@ Ag nanoclusters. *RSC adv.* **2014**, 4, 9825-9829, doi:<https://doi.org/10.1039/C3RA45019H>.

16. Barati, A.; Shamsipur, M.; Abdollahi, H. Metal-ion-mediated fluorescent carbon dots for indirect detection of sulfide ions. *Sens. Actuators, B* **2016**, *230*, 289-297, doi:<https://doi.org/10.1016/j.snb.2016.02.075>
17. Hai, Z.; Bao, Y.; Miao, Q.; Yi, X.; Liang, G. Pyridine–biquinoline–metal complexes for sensing pyrophosphate and hydrogen sulfide in aqueous buffer and in cells. *Anal. Chem.* **2015**, *87*, 2678-2684, doi:<https://doi.org/10.1021/ac504536q>.
18. Dong, Z.; Le, X.; Zhou, P.; Dong, C.; Ma, J. An “off–on–off” fluorescent probe for the sequential detection of Zn <sup>2+</sup> and hydrogen sulfide in aqueous solution. *New J. Chem.* **2014**, *38*, 1802-1808, doi:<https://doi.org/10.1039/C3NJ01487H>.
19. Ren, M.; Xu, Q.; Bai, Y.; Wang, S.; Kong, F. Construction of a dual-response fluorescent probe for copper (II) ions and hydrogen sulfide (H<sub>2</sub>S) detection in cells and its application in exploring the increased copper-dependent cytotoxicity in present of H<sub>2</sub>S. *Spectrochim. Acta, Part A* **2021**, *249*, 119299, doi:<https://doi.org/10.1016/j.saa.2020.119299>.
